# Supplementary material for: Human granzyme B regulatory B cells prevent effector CD4+CD25- T cell proliferation through a mechanism dependent from lymphotoxin alpha
Source: PubMed Central journal article supplement (PMC10425555; doi:10.3389/fimmu.2023.1183714), 2023-07-31
Supplement: DataSheet_1.pdf [file DataSheet_1.pdf]

## *Supplementary Material*

# **Human regulatory B cells prevent effector CD4+CD25- T cell proliferation through a mechanism dependent from granzyme B and lymphotoxin alpha**

**Nicolas Sailliet<sup>1</sup>, Hoa Mai<sup>1</sup>, Amandine Dupuy<sup>1</sup>, Gaëlle Tilly<sup>1</sup>, Cynthia Fourgeux<sup>1</sup>, Martin Braud<sup>1</sup>, Magali Giral<sup>1</sup>, Jean-Michel Robert<sup>2</sup>, Nicolas Degauque<sup>1</sup>, Richard Danger<sup>1\*</sup>, Jeremie Poschmann<sup>1\*</sup> and Sophie Brouard<sup>1\*</sup>**

<sup>1</sup> CHU Nantes, Nantes Université, INSERM, Center for Research in Transplantation and Translational Immunology (CR2TI), UMR 1064, ITUN, Nantes, France

<sup>2</sup> Institut de Recherche en Santé 2, Cibles et Médicaments des Infections et de l'Immunité IICiMed-UR1155, Nantes Université, 22, Boulevard Bénoni-Goullin, F-44000 Nantes, France

**\* Correspondence:**

Dr. Sophie Brouard, Dr. Jérémie Poschmann, Dr. Richard Danger ; Centre de Recherche en Transplantation et Immunologie INSERM UMR1064, Université de Nantes, Centre Hospitalier Universitaire de Nantes, 30 bd Jean Monnet, 44093 Nantes, France. Phone: +33 2 40 08 74 10, Email: [richard.danger@univ-nantes.fr](mailto:richard.danger@univ-nantes.fr); [jeremie.poschmann@univ-nantes.fr](mailto:jeremie.poschmann@univ-nantes.fr); [sophie.brouard@univ-nantes.fr](mailto:sophie.brouard@univ-nantes.fr)

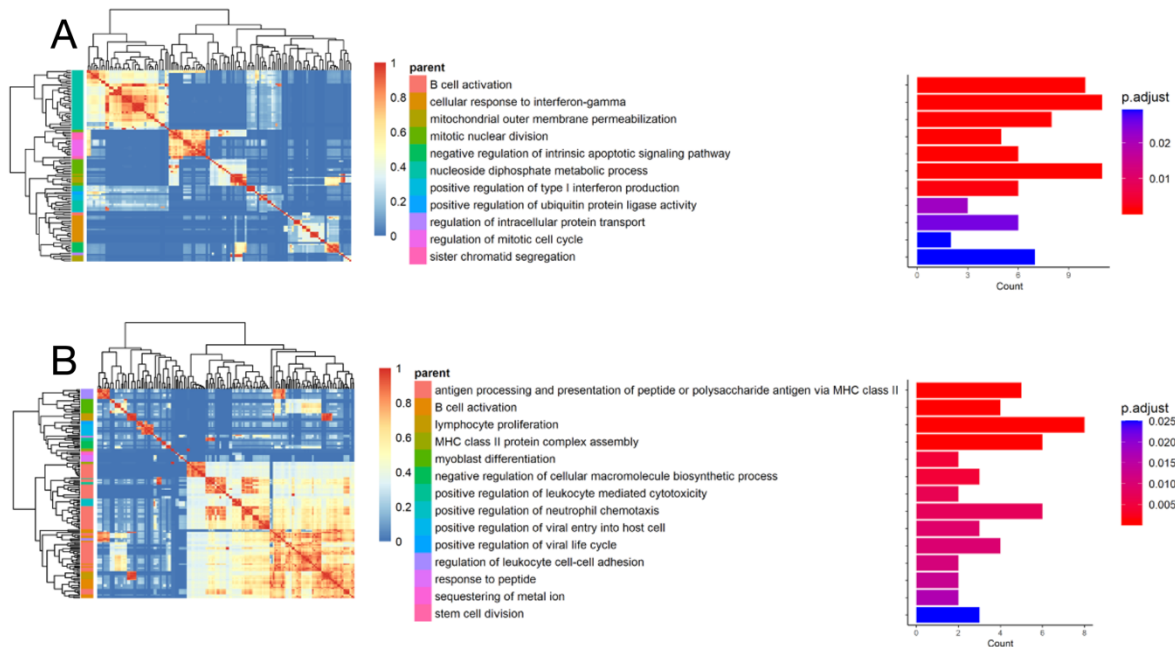

**Figure S1: GZMB+Bregs gene ontology reduction:** Gene ontology analysis was performed on the 104 up- and 45 down-regulated DEGs. The list of terms was then reduced using the rrvgo package (1.8.0). Heatmaps are representing term reduction of gene ontologies associated to genes enriched **(A)** or repressed **(B)** in GZMB+Bregs vs non-Bregs, color scale represents the homology between terms before reduction. Bar plots represent the adjusted p.value and the number of DEG associated to ontologies enriched or repressed in GZMB+Bregs vs non-Bregs. Only gene sets between 20 and 400 genes were analyzed.

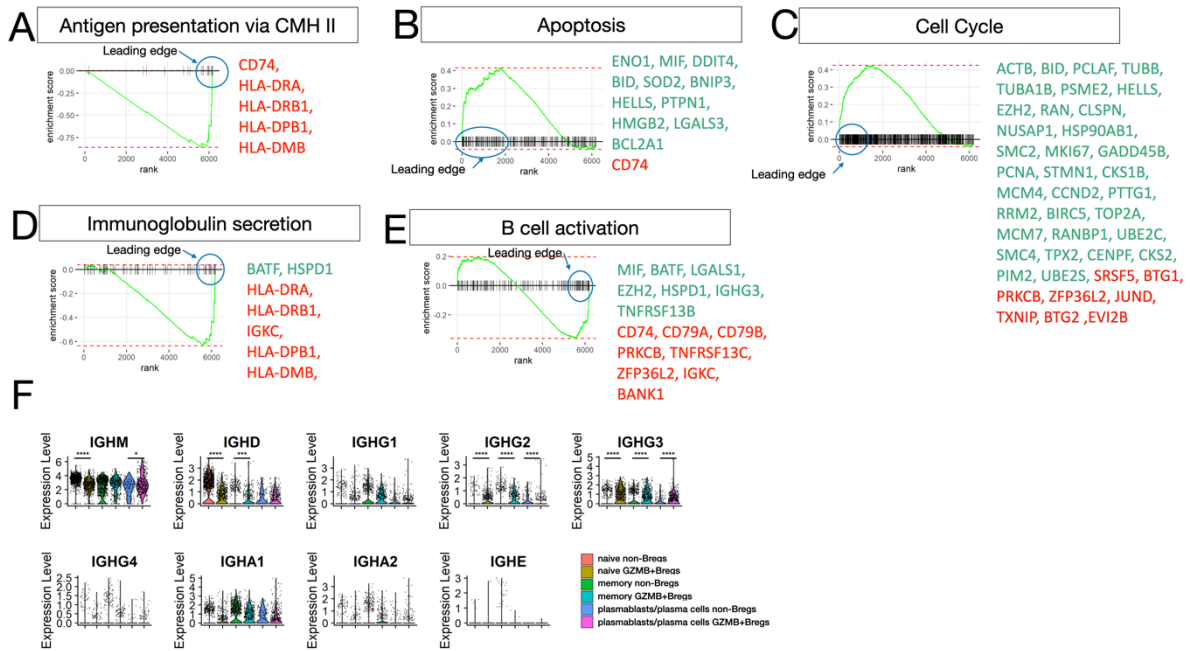

**Figure S2: Enrichment analysis of B cell functions and transcriptomic regulators:** (A-E) Graphs of GSEA enrichment with highly enriched (green) or repressed (red) contributing genes. (F) Differential expression of Ig heavy chains in Bregs versus non-Bregs.

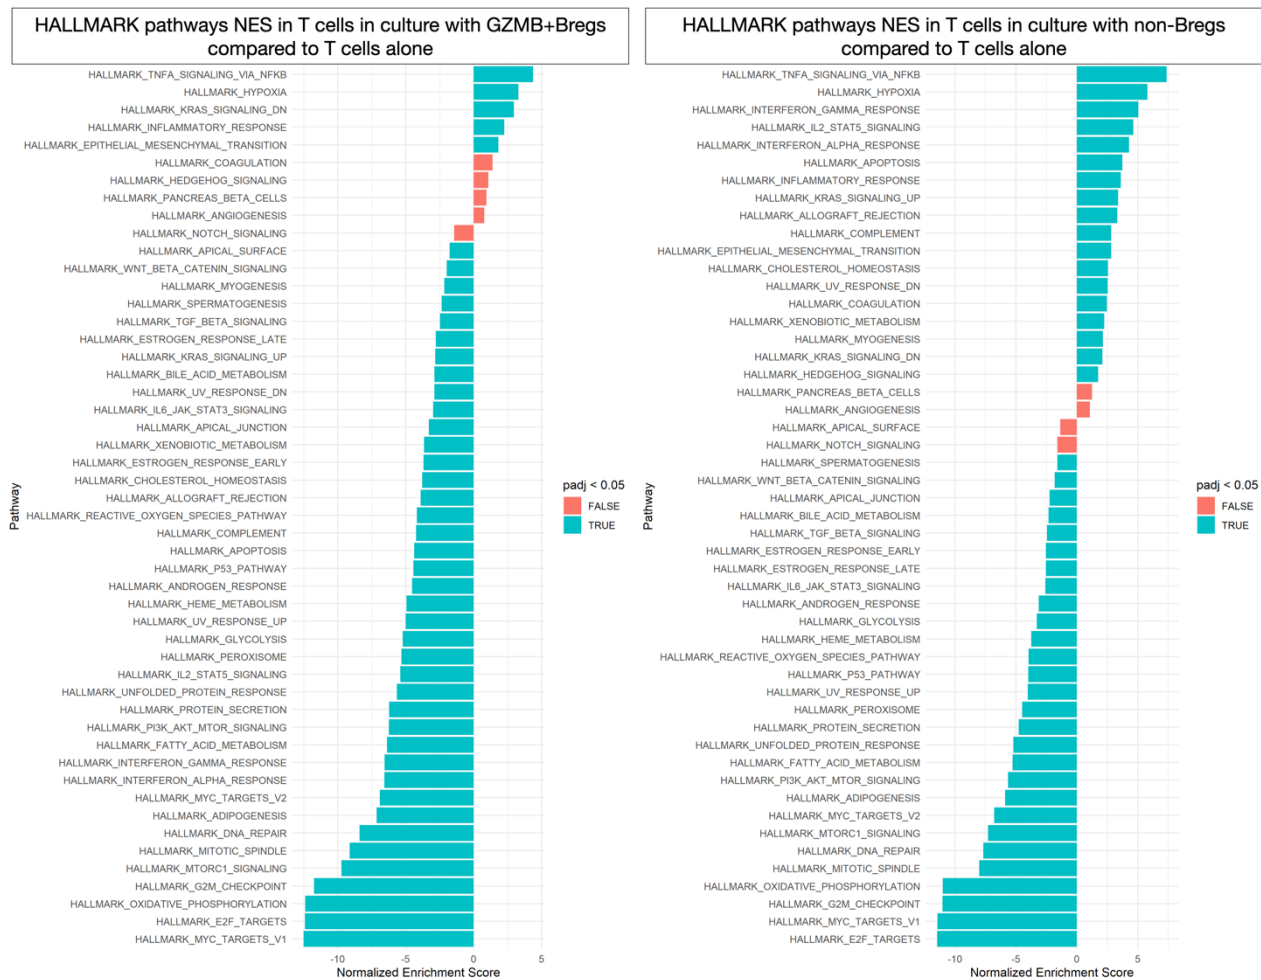

**Figure S3: T cell differential expression by GSEA:** GSEA analysis performed with the Hallmark gene sets (H) from the Molecular Signature Database (MSigDB) in T cells between T cells in coculture with GZMB+Bregs vs T cells alone (left) and in coculture with non-Bregs vs T cells alone (right) represented as a Barplot with the Normalized enrichment score in length. Gene sets with significant adjusted p.values are colored in blue.

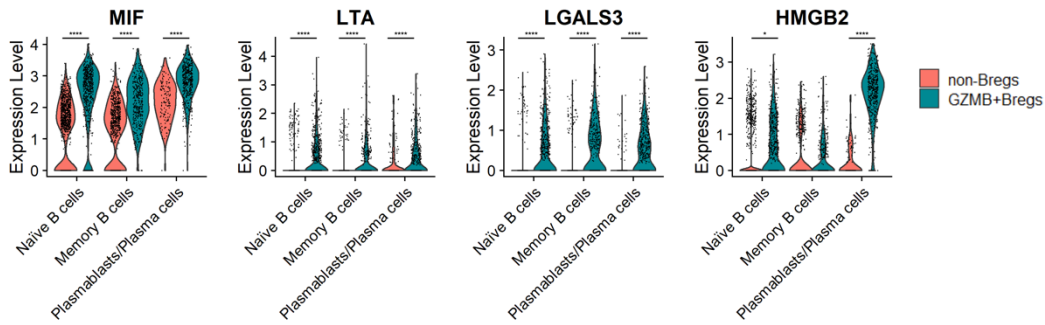

**Figure S4: Ligands expression among B cell population:** HMGB2, LTA, LGALS3 and MIF expression were compared between non-Bregs and GZMB+Bregs in plasmablasts, naive and memory B cells. Differences were defined as statistically significant when  $P < 0.05$  (\*),  $P < 0.01$  (\*\*),  $P < 0.001$  (\*\*\*) and  $P < 0.0001$  (\*\*\*\*).

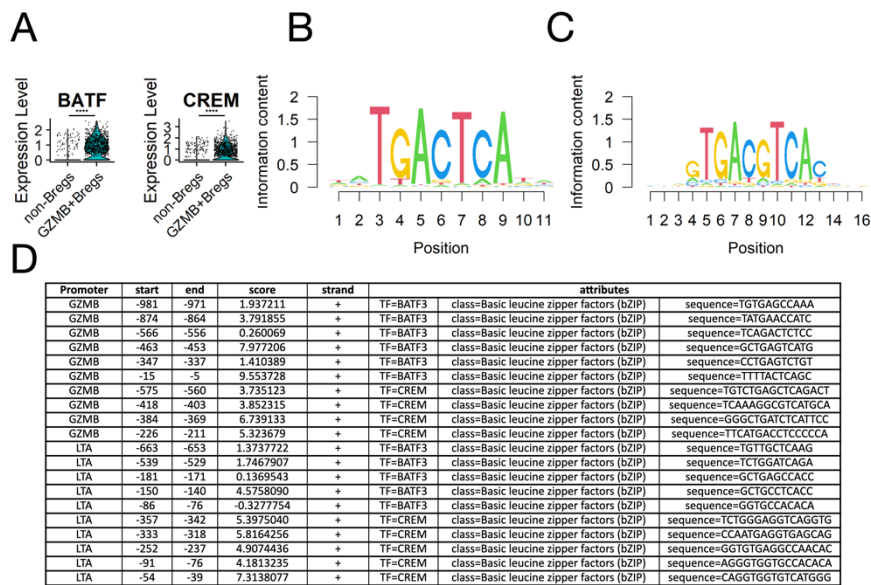

**Figure S5: sequence and sites of fixation for BATF and CREM:** (A) Violin plots for the two transcription factors BATF and CREM. (B-C) The consensus binding sequences for BATF (B) and CREM (C). Size of the letters are corresponding to the probability of getting the given nucleotide at that position. (D) Promoter sequences (0 to -1000 pb) of LTA and GZMB were fetched and scanned using the TFBSTools package to highlight patterns of BATF and CREM with a threshold of 70% of homology with their binding sequences. Differences were defined as statistically significant when  $P < 0.05$  (\*),  $P < 0.01$  (\*\*),  $P < 0.001$  (\*\*\*) and  $P < 0.0001$  (\*\*\*\*).
